# Supplementary material
Source: Springer Nature journal article supplement (https://www.springermedizin.de/resource/supplementary/13024_2012_377_MOESM3_ESM.pdf/9643828)

# Additional File 3

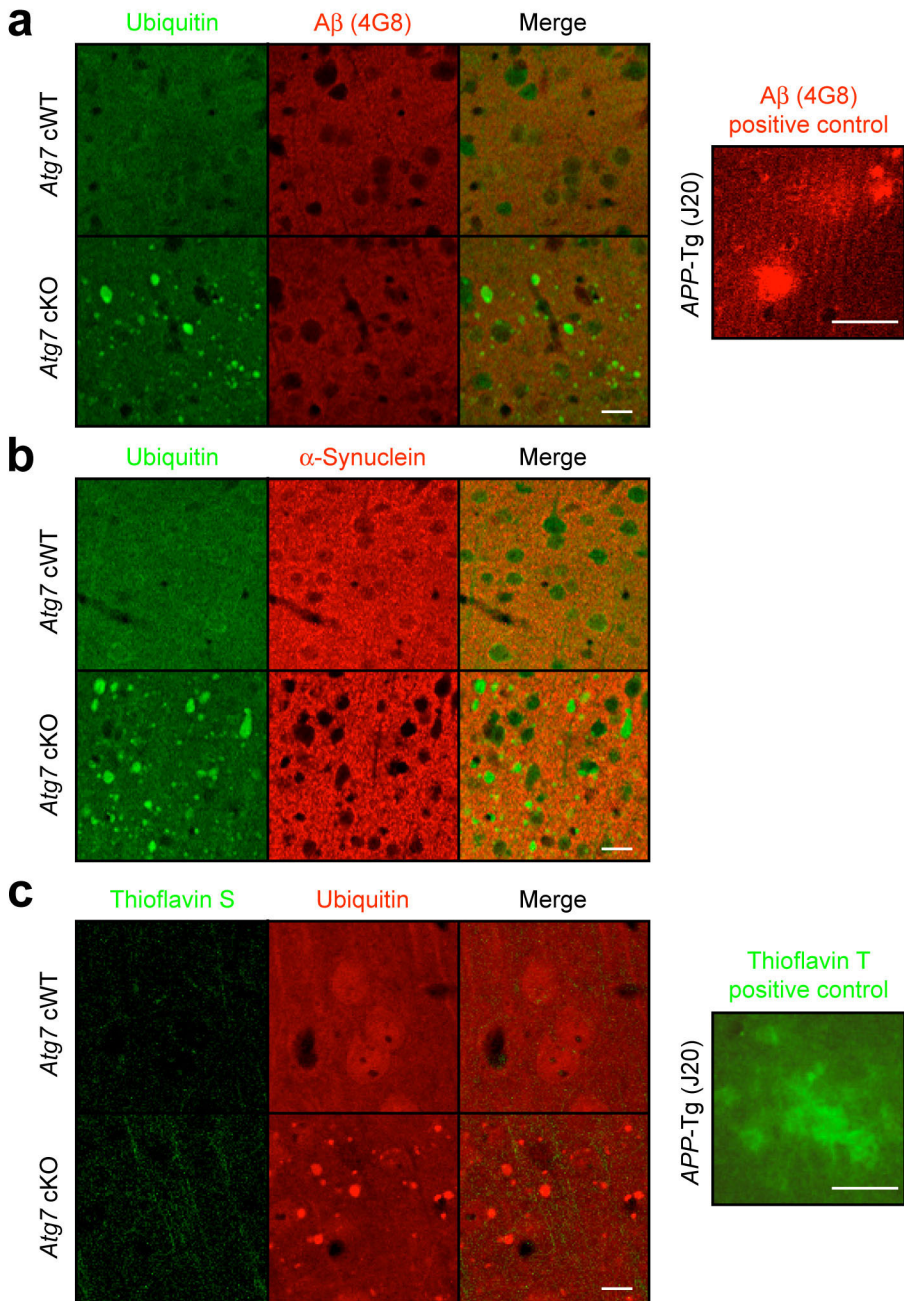

Supplement: MOESM3 [file 9643828]
